# Supplementary material for: Bacterial Endotoxin Activity in Human Serum Is Associated With Dyslipidemia, Insulin Resistance, Obesity, and Chronic Inflammation
Source: PubMed Central journal article supplement — Diabetes Care. 2011 Jul 16;34(8):1809–15. doi: 10.2337/dc10-2197 (PMC3142060; doi:10.2337/dc10-2197), 2011-07-16

SUPPLEMENTARY DATA

**Supplementary Table 1: Correlations of LPS-related variables with components of the metabolic syndrome in non-diabetic control (NDC) subjects and patients with IgAGN.** NDC\_lean (BMI≤25 kg/m<sup>2</sup>; n=219), NDC\_ow (BMI>25 kg/m<sup>2</sup>; n=126), NDC\_all (NDC\_lean + NDC\_ow; n=345), and patients with IgAGN (n=98). Pearson's r-values are shown in each panel († p≤0.05, \* p≤0.001).

A: Correlations between LPS/HDL-ratio and components of MetS.

|                       | NDC_lean      | NDC_ow        | NDC_all       | IgAGN         |
|-----------------------|---------------|---------------|---------------|---------------|
| lnLPS/HDL vs. HOMA    | 0.05          | 0.155         | <b>0.121†</b> | <b>0.230†</b> |
| lnLPS/HDL vs. Waist   | 0.129         | <b>0.281†</b> | <b>0.250*</b> | <b>0.402*</b> |
| lnLPS/HDL vs. TG      | <b>0.427*</b> | <b>0.427*</b> | <b>0.505*</b> | <b>0.496*</b> |
| lnLPS/HDL vs. insulin | <b>0.294*</b> | <b>0.403*</b> | <b>0.370*</b> | <b>0.251†</b> |
| lnLPS/HDL vs. CRP     | <b>0.272†</b> | <b>0.364*</b> | <b>0.331*</b> | 0.175         |
| lnLPS/HDL vs. BMI     | 0.053         | <b>0.192†</b> | <b>0.199*</b> | <b>0.343*</b> |

B: Correlations between LPS and components of MetS.

|                   | NDC_lean      | NDC_ow        | NDC_all       | IgAGN         |
|-------------------|---------------|---------------|---------------|---------------|
| lnLPS vs. HOMA    | 0.004         | <b>0.199†</b> | 0.092         | <b>0.213†</b> |
| lnLPS vs. Waist   | -0.080        | 0.151         | 0.051         | 0.051         |
| lnLPS vs. TG      | <b>0.320*</b> | <b>0.512*</b> | <b>0.396*</b> | <b>0.325†</b> |
| lnLPS vs. insulin | <b>0.264*</b> | <b>0.373*</b> | <b>0.312*</b> | <b>0.250†</b> |
| lnLPS vs. CRP     | <b>0.118†</b> | <b>0.390*</b> | <b>0.272*</b> | 0.135         |
| lnLPS vs. BMI     | -0.076        | 0.110         | 0.055         | 0.166         |
| lnLPS vs. HDL     | 0.132         | 0.084         | 0.098         | -0.063        |

C: Correlations between residual LPS and components of MetS.

|                      | NDC_lean      | NDC_ow        | NDC_all       | IgAGN         |
|----------------------|---------------|---------------|---------------|---------------|
| lnLPSres vs. HOMA    | 0.004         | 0.177         | <b>0.118†</b> | 0.161         |
| lnLPSres vs. Waist   | -0.019        | 0.154         | 0.073         | 0.076         |
| lnLPSres vs. TG      | <b>0.322*</b> | <b>0.506*</b> | <b>0.388*</b> | <b>0.332†</b> |
| lnLPSres vs. insulin | <b>0.240*</b> | <b>0.328*</b> | <b>0.281*</b> | 0.200         |
| lnLPSres vs. CRP     | <b>0.239†</b> | <b>0.340*</b> | <b>0.302*</b> | 0.114         |
| lnLPSres vs. BMI     | -0.054        | 0.133         | 0.061         | 0.192         |

*To examine the influence of HDL on the MetS correlations, residuals from the linear regression of LPS and HDL were calculated. Residuals were then correlated to the components of MetS, to avoid the effect of HDL-cholesterol.*

## SUPPLEMENTARY DATA

### Supplementary Table 2: Participating centers in the FinnDiane Collection.

#### The Finnish Diabetic Nephropathy Study Centers

|                                                                                      |                                                                                                                                                                       |
|--------------------------------------------------------------------------------------|-----------------------------------------------------------------------------------------------------------------------------------------------------------------------|
| Anjalankoski Health Center                                                           | S.Koivula, T.Uggeldahl                                                                                                                                                |
| Central Finland Central Hospital, Jyväskylä                                          | T.Forslund, A.Halonen, A.Koistinen, P.Koskiahho,                                                                                                                      |
|                                                                                      | M.Laukkanen, J.Saltevo, M.Tiihonen                                                                                                                                    |
| Central Hospital of Åland Islands, Mariehamn                                         | M.Forsen, H.Granlund, A.-C.Jonsson, B.Nyroos                                                                                                                          |
| Central Hospital of Kanta-Häme, Hämeenlinna                                          | P.Kinnunen, A.Orvola, T.Salonen, A.Vähänen                                                                                                                            |
| Central Hospital of Kymenlaakso, Kotka                                               | R.Paldanius, M.Riihelä, L.Ryysy                                                                                                                                       |
| Central Hospital of Länsi-Pohja, Kemi                                                | H.Laukkanen, P.Nyländen, A.Sademies                                                                                                                                   |
| Central Ostrobothnian Hospital District, Kokkola                                     | S.Anderson, B.Asplund, U.Byskata, P.Liedes,                                                                                                                           |
|                                                                                      | M.Kuusela, T.Virkkala                                                                                                                                                 |
| City of Espoo Health Center:                                                         |                                                                                                                                                                       |
| Espoonlahti                                                                          | A.Nikkola, E.Ritola                                                                                                                                                   |
| Tapiola                                                                              | M.Niska, H.Saarinen                                                                                                                                                   |
| Samaria                                                                              | E.Oukko-Ruononen, T.Virtanen                                                                                                                                          |
| Viherlaakso                                                                          | A.Lyytinen                                                                                                                                                            |
| City of Helsinki Health Center:                                                      |                                                                                                                                                                       |
| Puistola                                                                             | H.Kari, T.Simonen                                                                                                                                                     |
| Suutarila                                                                            | A.Kaprio, J.Kärkkäinen, B.Rantaeskola                                                                                                                                 |
| Töölö                                                                                | P.Kääriäinen, J.Haaga, A-L.Pietiläinen                                                                                                                                |
| City of Hyvinkää Health Center                                                       | S.Klemetti, T.Nyandoto, E.Rontu, S.Satuli-Autere                                                                                                                      |
| City of Vantaa Health Center:                                                        |                                                                                                                                                                       |
| Korso                                                                                | R.Toivonen, H.Virtanen                                                                                                                                                |
| Länsimäki                                                                            | R.Ahonen, M.Ivaska-Suomela, A.Jauhiainen                                                                                                                              |
| Martinlaakso                                                                         | M.Laine, T.Pellonpää, R.Puranen                                                                                                                                       |
| Myyrmäki                                                                             | A.Airas, J.Laakso, K.Rautavaara                                                                                                                                       |
| Rekola                                                                               | M.Erola, E.Jatkola                                                                                                                                                    |
| Tikkurila                                                                            | R.Lönnblad, A.Malm, J.Mäkelä, E.Rautamo                                                                                                                               |
| Heinola Health Center                                                                | P.Hentunen, J.Lagerstam                                                                                                                                               |
| Helsinki University Central Hospital, Department of Medicine, Division of Nephrology | A.Ahola, M.Feodoroff, D.Gordin, O.Heikkilä, K.Hietala, L.Salovaara, J.Kytö, S.Lindh, K.Pettersson-Fernholm, A.Sandelin, L.Thorn, J.Tuomikangas, T.Vesisenaho, J.Wadén |
| Herttoniemi Hospital, Helsinki                                                       | V.Sipilä                                                                                                                                                              |
| Hospital of Lounais-Häme, Forssa                                                     | T.Kalliomäki, J.Koskelainen, R.Nikkanen, N.Savolainen, H.Sulonen, E.Valtonen                                                                                          |
| Iisalmi Hospital                                                                     | E.Toivanen                                                                                                                                                            |
| Jokilaakso Hospital, Jämsä                                                           | A.Parta, I.Pirttiniemi                                                                                                                                                |
| Jorvi Hospital, Helsinki University Central Hospital                                 | S.Aranko, S.Ervasti, R.Kauppinen-Mäkelin, A.Kuusisto, T.Lepplä, K.Nikkilä, L.Pekkonen                                                                                 |
| Jyväskylä Health Center, Kyllö                                                       | K.Nuorva, M.Tiihonen                                                                                                                                                  |
| Kainuu Central Hospital, Kajaani                                                     | S.Jokelainen, P.Kemppainen, A-M.Mankinen, M.Sankari                                                                                                                   |
| Kerava Health Center                                                                 | H.Stuckey, P.Suominen                                                                                                                                                 |
| Kirkkonummi Health Center                                                            | A.Lappalainen, M.Liimatainen, J.Santaholma                                                                                                                            |
| Kivelä Hospital, Helsinki                                                            | A.Aimolahti, E.Huovinen                                                                                                                                               |
| Koskela Hospital, Helsinki                                                           | V.Ilkkä, M.Lehtimäki                                                                                                                                                  |
| Kotka Health Center                                                                  | E.Pälikkö-Kontinen, A.Vanhanen                                                                                                                                        |
| Kouvola Health Center                                                                | E.Koskinen, T.Siitonen                                                                                                                                                |
| Kuopio University Hospital                                                           | E.Huttunen, R.Ikäheimo, P.Karhapää, P.Kekäläinen, M.Laakso, T.Lakka, E.Lampainen, L.Moilanen, L.Niskanen, U.Tuovinen, I.Vauhkonen, E.Voutilainen                      |
| Kuusamo Health Center                                                                | T.Kääriäinen, E.Isopoussu                                                                                                                                             |

SUPPLEMENTARY DATA

|                                              |                                                                                                                          |
|----------------------------------------------|--------------------------------------------------------------------------------------------------------------------------|
| Kuusankoski Hospital                         | E.Kilkki, I.Koskinen, L.Riihelä                                                                                          |
| Laakso Hospital, Helsinki                    | T.Meriläinen, P.Poukka, R.Savolainen, N.Uhlenius                                                                         |
| Lahti City Hospital                          | A.Mäkelä, M.Tanner                                                                                                       |
| Lapland Central Hospital, Rovaniemi          | L.Hyvärinen, S.Severinkangas, T.Tulokas                                                                                  |
| Lappeenranta Health Center                   | P.Linkola, I.Pulli                                                                                                       |
| Lohja Hospital                               | T.Granlund, M.Saari, T.Salonen                                                                                           |
| Länsi-Uusimaa Hospital, Tammisaari           | I.-M.Jousmaa, J.Rinne                                                                                                    |
| Loimaa Health Center                         | A.Mäkelä, P.Eloranta                                                                                                     |
| Malmi Hospital, Helsinki                     | H.Lanki, S.Moilanen, M.Tilly-Kiesi                                                                                       |
| Mikkeli Central Hospital                     | A.Gynther, R.Manninen, P.Nironen, M.Salminen, T.Vänttinen                                                                |
| Mänttä Regional Hospital                     | I.Pirttiniemi, A-M.Hänninen                                                                                              |
| North Karelian Hospital, Joensuu             | U-M.Henttula, P.Kekäläinen, M.Pietarinen, A.Rissanen, M.Voutilainen                                                      |
| Nurmijärvi Health Center                     | A.Burgos, K.Urtamo                                                                                                       |
| Oulaskangas Hospital, Oulainen               | E.Jokelainen, P.-L.Jylkkä, E.Kaarlela, J.Vuolaspuro                                                                      |
| Oulu Health Center                           | L.Hiltunen, R.Häkkinen, S.Keinänen-Kiukaanniemi                                                                          |
| Oulu University Hospital                     | R.Ikäheimo                                                                                                               |
| Päijät-Häme Central Hospital                 | H.Haapamäki, A.Helanterä, S.Hämäläinen, V.Ilvesmäki, H.Miettinen                                                         |
| Palokka Health Center                        | P.Sopanen, L.Welling                                                                                                     |
| Pieksämäki Hospital                          | V.Javtsenko, M.Tamminen                                                                                                  |
| Pietarsaari Hospital                         | M-L.Holmbäck, B.Isomaa, L.Sarelin                                                                                        |
| Pori City Hospital                           | P.Ahonen, P.Merensalo, K.Sävelä                                                                                          |
| Porvoo Hospital                              | M.Kallio, B.Rask, S.Rämö                                                                                                 |
| Raahe Hospital                               | A.Holma, M.Honkala, A.Tuomivaara, R.Vainionpää                                                                           |
| Rauma Hospital                               | K.Laine, K.Saarinen, T.Salminen                                                                                          |
| Riihimäki Hospital                           | P.Aalto, E.Immonen, L.Juurinen                                                                                           |
| Salo Hospital                                | A.Alanko, J.Lapinleimu, P.Rautio, M.Virtanen                                                                             |
| Satakunta Central Hospital, Pori             | M.Asola, M.Juhola, P.Kunelius, M.-L.Lahdenmäki, P.Pääkkönen, M.Rautavirta                                                |
| Savonlinna Central Hospital                  | T.Pulli, P.Sallinen, M.Taskinen, E.Tolvanen, H.Valtonen, A.Vartia                                                        |
| Seinäjoki Central Hospital                   | E.Korpi-Hyövälti, T.Latvala, E.Leijala                                                                                   |
| South Karelia Central Hospital, Lappeenranta | T.Ensala, E.Hussi, R.Härkönen, U.Nyholm, J.Toivanen                                                                      |
| Tampere Health Center                        | A.Vaden, P.Alarotu, E.Kujansuu, H.Kirkkopelto-Jokinen, M.Helin, S.Gummerus, L.Calonius, T.Niskanen, T.Kaitala, T.Vatanen |
| Tampere University Hospital                  | I.Ala-Houhala, T.Kuningas, P.Lampinen, M.Määttä, H.Oksala, T.Oksanen, K.Salonen, H.Tauriainen, S.Tulokas                 |
| Tiirismaa Health Center, Hollola             | T.Kivelä, L.Petlin, L.Savolainen                                                                                         |
| Turku Health Center                          | I.Hämäläinen, H.Virtamo, M.Vähätalo                                                                                      |
| Turku University Central Hospital            | K.Breitholz, R.Eskola, K.Metsärinne, U.Pietilä, P.Saarinen, R.Tuominen, S.Äyräpää                                        |
| Vaajakoski Health Center                     | K.Mäkinen, P.Sopanen                                                                                                     |
| Valkeakoski Regional Hospital                | S.Ojanen, E.Valtonen, H.Ylönen, M.Rautiainen, T.Immonen                                                                  |
| Vammala Regional Hospital                    | I.Isomäki, R.Kroneld, M.Tapiolinna-Mäkelä                                                                                |
| Vasa Central Hospital                        | S.Bergkulla, U.Hautamäki, V.-A.Myllyniemi, I.Rusk                                                                        |

SUPPLEMENTARY DATA

**Supplementary Figure 1: Relationships between individual components of MetS and serum LPS-activity in type 1 diabetic patients with normal albumin excretion.** Type 1 diabetic patients with normal AER (n=573) were divided into groups based on how many individual MetS criteria were fulfilled (scores 1-5): central obesity (waist circumference in men  $\geq 94$  cm and women  $\geq 80$  cm); triglycerides  $\geq 1.7$ mmol/l; HDL-cholesterol in men  $< 1.0$  mmol/l and women  $< 1.30$  mmol/l; blood pressure (BP)  $\geq 130/85$  mmHg; and fasting glucose (GLUC)  $\geq 6.11$  mmol/l. All diabetic patients obtained one score for high blood glucose. Subjects, who had four or five scores were pooled into one group due to a low number of patients.

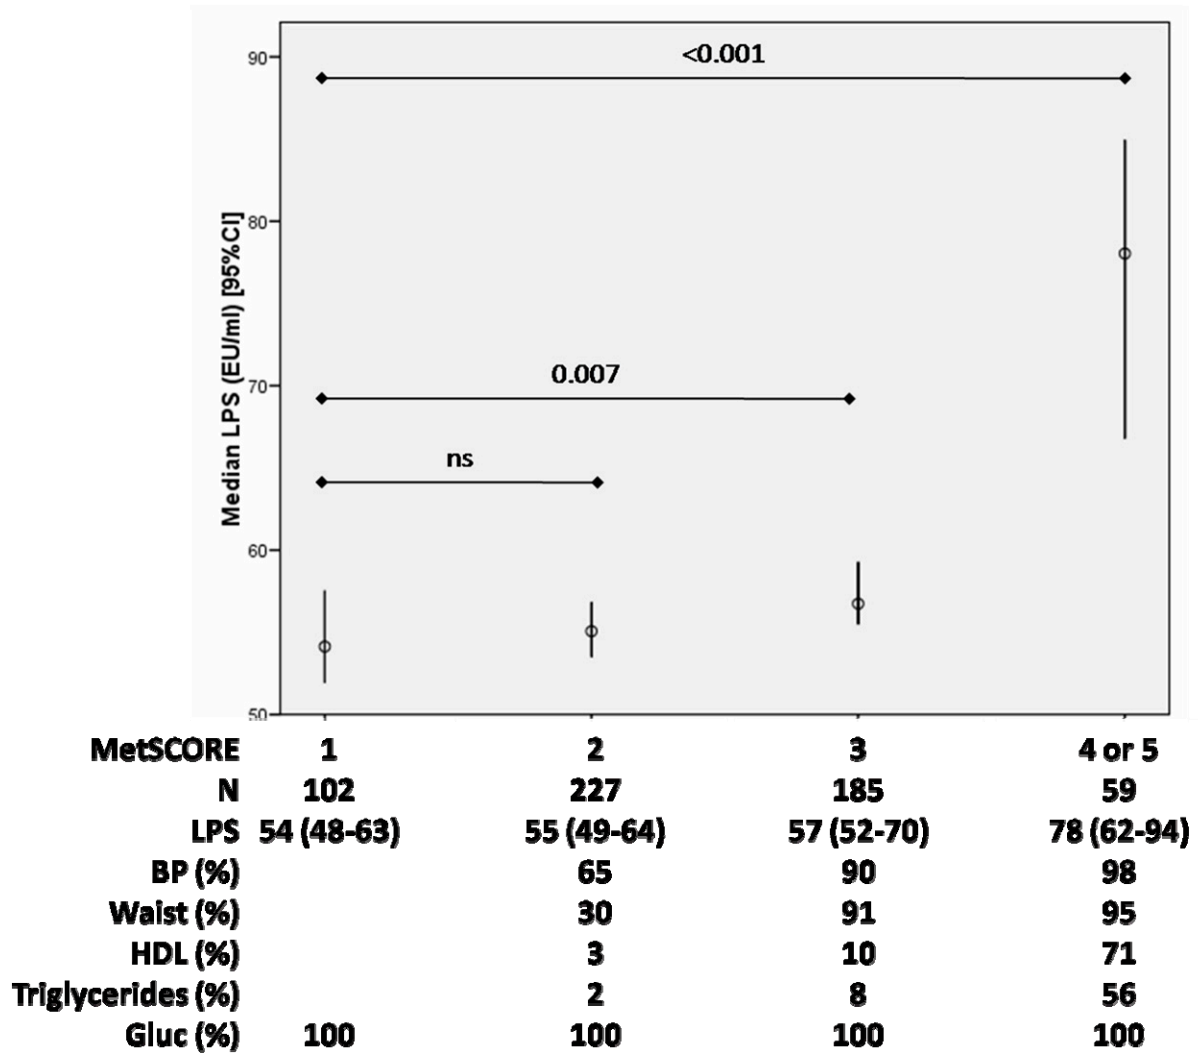

SUPPLEMENTARY DATA

**Supplementary Figure 2: Relationships between LPS/HDL-ratio, BMI and fasting insulin in non-diabetic control (NDC) subjects.** Subjects in the NDC\_all (n=345) were divided into eight groups based on BMI cut-off 25 kg/m<sup>2</sup> and quartiles of fasting insulin. Data shown as LPS/HDL median values (ns, non-significant, † p≤0.05, \* p≤0.001).

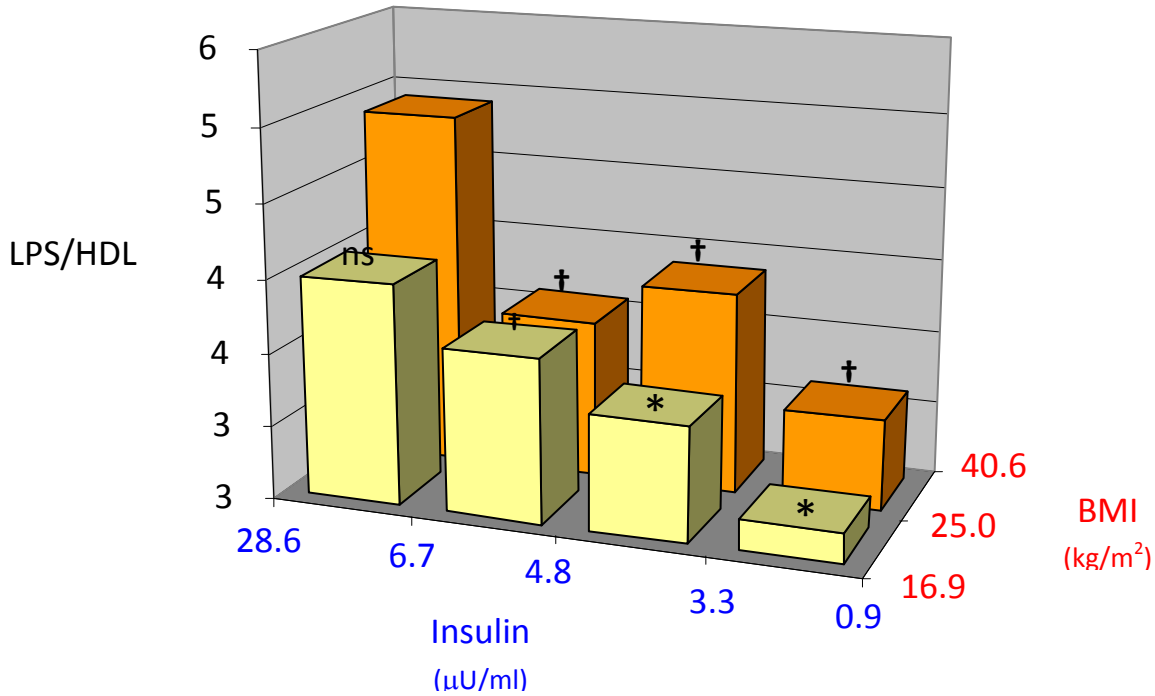

SUPPLEMENTARY DATA

**Supplementary Figure 2: Relationships between LPS/HDL-ratio and serum triglycerides in type 1 diabetic patients with macroalbuminuria and patients with IgAGN.** A) Correlations between LPS/HDL-ratio and serum triglycerides. Type 1 diabetic patients with macroalbuminuria shown as blue circles ( $r=0.82$ ;  $p<0.001$ ) and patients with IgAGN shown as red circles ( $r=0.50$ ;  $p<0.001$ ). B) Type 1 diabetic patients with macroalbuminuria (blue) and patients with IgAGN (red) were divided in three groups according to serum triglyceride concentrations ( $<1.0$ ,  $1.0-1.7$ ,  $>1.7$  mmol/l). The number of patients is shown within the bars. Data shown as median and 95% CI (\*  $p<0.001$ ).

(A)

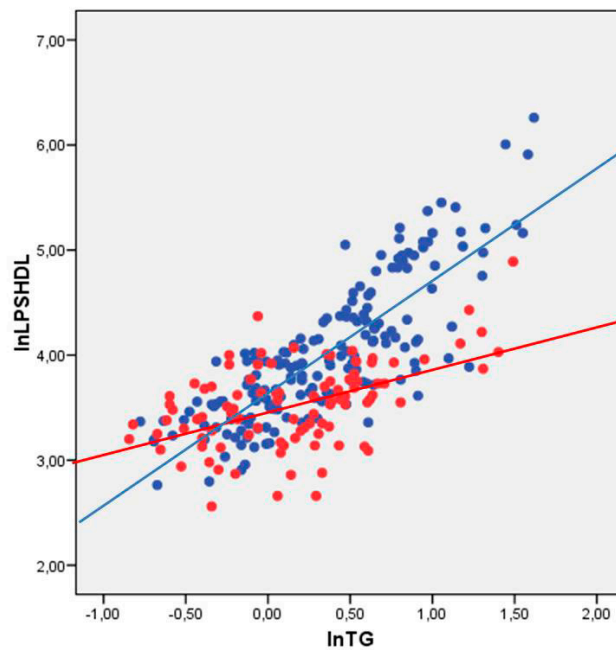

(B)

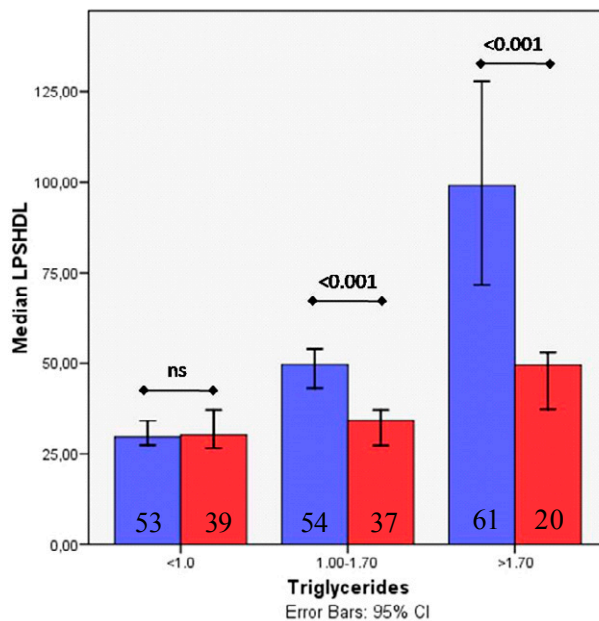

Supplement: supp_dc10-2197v102197_DC102197SupplementaryData.pdf [file supp_dc10-2197v102197_DC102197SupplementaryData.pdf]
